# Supplementary material for: Integrated Stability and Metabolomic Investigation of New Rifampicin and Isoniazid co-loaded Liposome against Tuberculosis
Source: Research Square preprint supplement (doi:10.21203/rs.3.rs-7913588/v1), 2025-11-05
Supplement: Supplementary file 1 [file db251918211b738907dd43be.docx]

**
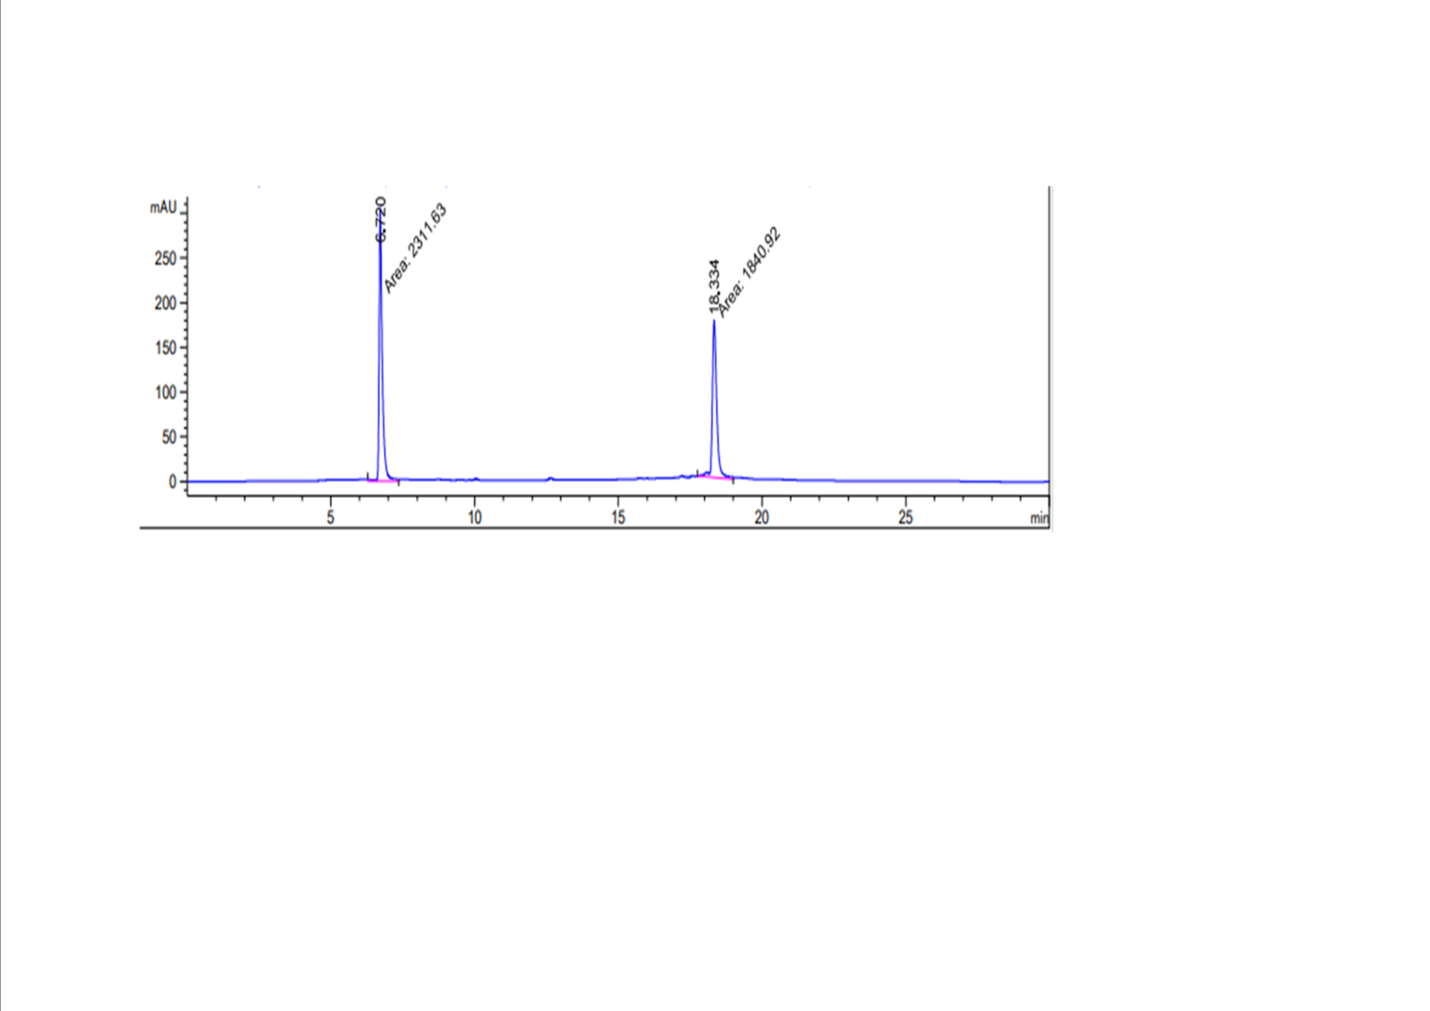
**

**Supplementary figure 1.** HPLC Detection of RIF and INH: Representative chromatogram.


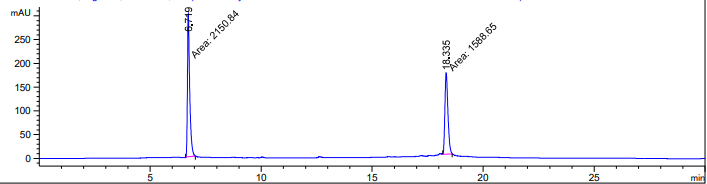


**Supplementary figure 2.** Representative HPLC chromatogram of RIF and INH at day 0 (initial analysis).


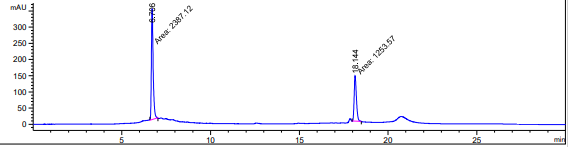


**Supplementary figure 3.** Representative HPLC chromatogram of RIF and INH co-loaded liposome at day 0 (initial analysis).

**Supplementary figure 4.** Growth curve evaluation of *M. smeg* exposed to placebo, PMs, and liposome Formulations (n=3).

**Table S1.** Independent and dependent variables selected for BBD.

| **Independent variables** | **Dependent variables** |
| --- | --- |
| **A:**L-CH (mg) | **R1:** Particle size (nm)  **R2:** PDI  **R3**  EE (%) : (RIF)  **R4** EE(%) : (INH) |
| **B:**T-80 (mg) |
| **C:** RI (mg) |

**Table S2.** Experimental runs obtained for BBD.

| **Experimental run** | **A: L-CH (mg)** | **B: T-80(mg)** | **C: RI(mg)** |
| --- | --- | --- | --- |
| 1 | 4.5 | 5.0 | 30 |
| 2 | 4.5 | 7.0 | 20 |
| 3 | 6.0 | 5.0 | 20 |
| 4 | 6.0 | 5.0 | 40 |
| 5 | 4.5 | 5.0 | 30 |
| 6 | 4.5 | 3.0 | 40 |
| 7 | 4.5 | 5.0 | 30 |
| 8 | 6.0 | 3.0 | 30 |
| 9 | 4.5 | 7.0 | 40 |
| 10 | 6.0 | 7.0 | 30 |
| 11 | 4.5 | 5.0 | 30 |
| 12 | 3.0 | 3.0 | 30 |
| 13 | 4.5 | 5.0 | 30 |
| 14 | 3.0 | 5.0 | 40 |
| 15 | 4.5 | 3.0 | 20 |
| 16 | 3.0 | 5.0 | 20 |
| 17 | 3.0 | 7.0 | 30 |

### ANOVA for Quadratic model

**Table S3. ANOVA results of DOE analysis for response 1: Size.**

| **Source** | **Sum of Squares** | **df** | **Mean Square** | **F-value** | **p-value** |  |
| --- | --- | --- | --- | --- | --- | --- |
| **Model** | 2.84 | 9 | 0.3156 | 7.50 | 0.0073 | significant |
| A-L-CH | 0.2450 | 1 | 0.2450 | 5.82 | 0.0466 |  |
| B-T 80 | 0.4512 | 1 | 0.4512 | 10.73 | 0.0136 |  |
| C-RI | 0.7812 | 1 | 0.7812 | 18.57 | 0.0035 |  |
| AB | 0.4225 | 1 | 0.4225 | 10.04 | 0.0157 |  |
| AC | 0.1225 | 1 | 0.1225 | 2.91 | 0.1317 |  |
| BC | 0.1600 | 1 | 0.1600 | 3.80 | 0.0921 |  |
| A² | 0.0038 | 1 | 0.0038 | 0.0901 | 0.7728 |  |
| B² | 0.6569 | 1 | 0.6569 | 15.62 | 0.0055 |  |
| C² | 0.0001 | 1 | 0.0001 | 0.0025 | 0.9615 |  |
| **Residual** | 0.2945 | 7 | 0.0421 |  |  |  |
| Lack of Fit | 0.1625 | 3 | 0.0542 | 1.64 | 0.3146 | not significant |
| Pure Error | 0.1320 | 4 | 0.0330 |  |  |  |
| **Cor Total** | 3.14 | 16 |  |  |  |  |

**Table S4. ANOVA results of DOE analysis for response 2: PDI.**

| **Source** | **Sum of Squares** | **df** | **Mean Square** | **F-value** | **p-value** |  |
| --- | --- | --- | --- | --- | --- | --- |
| **Model** | 0.0003 | 9 | 0.0000 | 9.33 | 0.0038 | significant |
| A-L-CH | 0.0000 | 1 | 0.0000 | 7.22 | 0.0312 |  |
| B-T 80 | 0.0001 | 1 | 0.0001 | 14.94 | 0.0062 |  |
| C-RI | 0.0001 | 1 | 0.0001 | 22.43 | 0.0021 |  |
| AB | 0.0000 | 1 | 0.0000 | 12.05 | 0.0104 |  |
| AC | 0.0000 | 1 | 0.0000 | 3.87 | 0.0897 |  |
| BC | 0.0000 | 1 | 0.0000 | 3.98 | 0.0862 |  |
| A² | 1.074E-06 | 1 | 1.074E-06 | 0.3210 | 0.5887 |  |
| B² | 0.0001 | 1 | 0.0001 | 19.34 | 0.0032 |  |
| C² | 1.274E-08 | 1 | 1.274E-08 | 0.0038 | 0.9525 |  |
| **Residual** | 0.0000 | 7 | 3.346E-06 |  |  |  |
| Lack of Fit | 0.0000 | 3 | 4.462E-06 | 1.78 | 0.2901 | not significant |
| Pure Error | 0.0000 | 4 | 2.508E-06 |  |  |  |
| **Cor Total** | 0.0003 | 16 |  |  |  |  |

**Table S5. ANOVA results of DOE analysis for response 3: EE% (RIF).**

| **Source** | **Sum of Squares** | **df** | **Mean Square** | **F-value** | **p-value** |  |
| --- | --- | --- | --- | --- | --- | --- |
| **Model** | 217.51 | 9 | 24.17 | 5.79 | 0.0152 | significant |
| A-L-CH | 0.1405 | 1 | 0.1405 | 0.0337 | 0.8596 |  |
| B-T 80 | 3.82 | 1 | 3.82 | 0.9161 | 0.3704 |  |
| C-RI | 6.07 | 1 | 6.07 | 1.46 | 0.2669 |  |
| AB | 0.0004 | 1 | 0.0004 | 0.0001 | 0.9925 |  |
| AC | 105.06 | 1 | 105.06 | 25.18 | 0.0015 |  |
| BC | 46.72 | 1 | 46.72 | 11.20 | 0.0123 |  |
| A² | 1.59 | 1 | 1.59 | 0.3807 | 0.5567 |  |
| B² | 5.70 | 1 | 5.70 | 1.37 | 0.2808 |  |
| C² | 49.30 | 1 | 49.30 | 11.81 | 0.0109 |  |
| **Residual** | 29.21 | 7 | 4.17 |  |  |  |
| Lack of Fit | 15.30 | 3 | 5.10 | 1.47 | 0.3503 | not significant |
| Pure Error | 13.91 | 4 | 3.48 |  |  |  |
| **Cor Total** | 246.72 | 16 |  |  |  |  |

**Table S6. ANOVA results of DOE analysis for response 4: EE% (INH).**

| **Source** | **Sum of Squares** | **df** | **Mean Square** | **F-value** | **p-value** |  |
| --- | --- | --- | --- | --- | --- | --- |
| **Model** | 342.52 | 9 | 38.06 | 5.66 | 0.0162 | significant |
| A-L-CH | 184.90 | 1 | 184.90 | 27.49 | 0.0012 |  |
| B-T 80 | 19.00 | 1 | 19.00 | 2.83 | 0.1367 |  |
| C-RI | 33.91 | 1 | 33.91 | 5.04 | 0.0596 |  |
| AB | 1.55 | 1 | 1.55 | 0.2304 | 0.6458 |  |
| AC | 29.11 | 1 | 29.11 | 4.33 | 0.0761 |  |
| BC | 45.97 | 1 | 45.97 | 6.83 | 0.0347 |  |
| A² | 5.91 | 1 | 5.91 | 0.8790 | 0.3797 |  |
| B² | 10.95 | 1 | 10.95 | 1.63 | 0.2427 |  |
| C² | 12.42 | 1 | 12.42 | 1.85 | 0.2163 |  |
| **Residual** | 47.08 | 7 | 6.73 |  |  |  |
| Lack of Fit | 37.21 | 3 | 12.40 | 5.03 | 0.0764 | not significant |
| Pure Error | 9.87 | 4 | 2.47 |  |  |  |
| **Cor Total** | 389.61 | 16 |  |  |  |  |

**Table S7.** Comparative stability evaluation of RIF and INH in PMs and liposomal formulation under accelerated storage conditions (40 ± 2°C / 75 ± 5% RH for 3 months).

| **Sample type** | **Time** | **Assay (% of initial)** | **Particle Size (nm)**  (n = 3) | **PDI**  (n = 3) |
| --- | --- | --- | --- | --- |
| Plain Mixture (RIF + INH) | 0 Month | RIF: 99.2 ± 1.2 INH: 99.7 ± 1.1 | 135.36 ± 2.8 | 0.245 ± 0.01 |
| 1 Month | RIF: 98.5 ± 0.9 INH: 98.9 ± 1.4 | 139.21 ± 2.7 | 0.376 ± 0.02 |
| 3 Months | RIF: 97.3 ± 1.1 INH: 97.7 ± 1.2 | 153.43 ± 3.8 | 0.398 ± 0.02 |
| Liposomal Formulation (RIF + INH) | 0 Month | RIF: 99.8 ± 1.0 INH: 99.7 ± 1.9 | 121.6 ± 1.8 | 0.72 ± 0.01 |
| 1 Month | RIF: 99.1 ± 1.2 INH: 98.3 ± 1.0 | 125.1 ± 3.5 | 0.278 ± 0.01 |
| 3 Months | RIF: 97.2 ± 1.1 INH: 97.6 ± 1.2 | 129.3 ± 3.9 | - 1. 0.02 |

**Table S8.** HPLC optimized chromatographic conditions.

| Instrument | Agilent Infinity II 1260 |
| --- | --- |
| Column | Inertsil ODS-3V C18 Column (4.6 x 250 mm, 5µm) |
| Mobile phase | A- 200 mM Ammonium formate buffer (pH: 6.2)  B- Methanol |
| Flow rate | 1 ml/min |
| Run time | 30 min |
| UV absorbance | 254nm |
| Elution mode | Gradient (0-15 min, 97% A; 15-25 min, 10% A; 25-30 min, 97%A) |
| Column temperature | 25º C |
| Autosampler temperature | 5 º C |
| Injection volume | 20 µl |

**Table S9.** Pathway results for untargeted metabolites.

| **Pathways** | **Total** | **Expected** | **Hits** | **Raw p** | **#NAME?** | **Holm adjust** | **FDR** | **Impact** |
| --- | --- | --- | --- | --- | --- | --- | --- | --- |
| Threonine metabolism | 29 | 0.42942 | 5 | 3.32E-05 | 4.4795 | 0.003216 | 0.003216 | 0.40995 |
| Pantothenate and CoA biosynthesis | 22 | 0.32577 | 4 | 0.000195 | 3.709 | 0.01876 | 0.009478 | 0.04153 |
| Purine metabolism | 15 | 0.22211 | 3 | 0.001076 | 2.9681 | 0.10225 | 0.030377 | 0.11538 |
| Cysteine and methionine metabolism | 36 | 0.53307 | 4 | 0.00139 | 2.857 | 0.13067 | 0.030377 | 0.34121 |
| Sulfur metabolism | 17 | 0.25173 | 3 | 0.00158 | 2.8014 | 0.14694 | 0.030377 | 0.09954 |
| Phenylalanine metabolism | 18 | 0.26654 | 3 | 0.001879 | 2.7261 | 0.17287 | 0.030377 | 0.15385 |
| One carbon pool by folate | 19 | 0.28134 | 3 | 0.002211 | 2.6553 | 0.20124 | 0.030643 | 0.21283 |
| Thiamine metabolism | 20 | 0.29615 | 3 | 0.002578 | 2.5887 | 0.23205 | 0.031263 | 0 |
| Phenylalanine, tyrosine and tryptophan biosynthesis | 22 | 0.32577 | 3 | 0.003421 | 2.4658 | 0.30448 | 0.033185 | 0.09839 |
| Valine, leucine and isoleucine biosynthesis | 22 | 0.32577 | 3 | 0.003421 | 2.4658 | 0.30448 | 0.033185 | 0.10727 |
| Glutamic acid | 12 | 0.17769 | 2 | 0.012406 | 1.9064 | 1 | 0.1094 | 0 |
| Cyanoamino acid metabolism | 17 | 0.25173 | 2 | 0.024492 | 1.611 | 1 | 0.19798 | 0 |
| Glutathione metabolism | 18 | 0.26654 | 2 | 0.027319 | 1.5635 | 1 | 0.20384 | 0.13083 |
| Alanine, aspartate and glutamate metabolism | 20 | 0.29615 | 2 | 0.03335 | 1.4769 | 1 | 0.21566 | 0.0051 |
| Citrate acid (TCA cycle) | 20 | 0.29615 | 2 | 0.03335 | 1.4769 | 1 | 0.21566 | 0.09997 |
| Methionine metabolism | 22 | 0.32577 | 2 | 0.039859 | 1.3995 | 1 | 0.22366 | 0.00193 |
| Other carbon fixation pathways | 23 | 0.34057 | 2 | 0.043284 | 1.3637 | 1 | 0.22366 | 0.16725 |
| Pyruvate metabolism | 23 | 0.34057 | 2 | 0.043284 | 1.3637 | 1 | 0.22366 | 0.21554 |
| Novobiocin biosynthesis | 3 | 0.044423 | 1 | 0.043811 | 1.3584 | 1 | 0.22366 | 0 |
| Propanoate metabolism | 25 | 0.37019 | 2 | 0.050456 | 1.2971 | 1 | 0.24471 | 0.00131 |
| Glyoxylate and dicarboxylate metabolism | 30 | 0.44423 | 2 | 0.070108 | 1.1542 | 1 | 0.30033 | 0.00606 |
| Dioxin degradation | 5 | 0.074038 | 1 | 0.072015 | 1.1426 | 1 | 0.30033 | 0 |
| Xylene degradation | 5 | 0.074038 | 1 | 0.072015 | 1.1426 | 1 | 0.30033 | 0 |
| Methane metabolism | 31 | 0.45903 | 2 | 0.074308 | 1.129 | 1 | 0.30033 | 0.08738 |
| Sphingolipid metabolism | 6 | 0.088845 | 1 | 0.085825 | 1.0664 | 1 | 0.333 | 0 |
| Valine, leucine and isoleucine degradation | 38 | 0.56269 | 2 | 0.10586 | 0.97529 | 1 | 0.39101 | 0 |
| C5-Branched dibasic acid metabolism | 8 | 0.11846 | 1 | 0.11287 | 0.94742 | 1 | 0.39101 | 0 |
| beta-Alanine metabolism | 8 | 0.11846 | 1 | 0.11287 | 0.94742 | 1 | 0.39101 | 0.69231 |
| Taurine and hypotaurine metabolism | 12 | 0.17769 | 1 | 0.16473 | 0.78322 | 1 | 0.55101 | 0 |
| Carbon fixation by Calvin cycle | 16 | 0.23692 | 1 | 0.21376 | 0.67008 | 1 | 0.66309 | 0 |
| Lysine degradation | 17 | 0.25173 | 1 | 0.22559 | 0.64669 | 1 | 0.66309 | 0 |
| Benzoate degradation | 17 | 0.25173 | 1 | 0.22559 | 0.64669 | 1 | 0.66309 | 0 |
| Terpenoid backbone biosynthesis | 17 | 0.25173 | 1 | 0.22559 | 0.64669 | 1 | 0.66309 | 0 |
| Arginine biosynthesis | 18 | 0.26654 | 1 | 0.23725 | 0.62479 | 1 | 0.67686 | 0 |
| Tyrosine metabolism | 22 | 0.32577 | 1 | 0.28228 | 0.54932 | 1 | 0.78232 | 0 |
| Glycolysis or Gluconeogenesis | 24 | 0.35538 | 1 | 0.30386 | 0.51733 | 1 | 0.81872 | 0.09901 |

**Table S8** Total 370 untargeted metabolites

| S. No. | Name | Formula | Log2 Fold Change: (BLANK) / (CONT) | Log2 Fold Change: (Formulation) / (CONT) | Log2 Fold Change: (Placebo) / (CONT) | Log2 Fold Change: (PM) / (CONT) |
| --- | --- | --- | --- | --- | --- | --- |
|  | DL-Lactic Acid | C3H6O3 | -Infinity | 5.93 | 4.98 | 5.94 |
|  | 7a-Hydroxy-cholestene-3-one | C27H44O2 | -Infinity | -1.45 | 5.49 | 0.22 |
|  | 1,2-distearoyl-sn-glycero-3-phosphoethanolamine (DSPE) | C28H52O6P2 | -Infinity | -4.28 | -0.84 | -4.92 |
|  | Stigmatellin Y | C29H40O6 | -Infinity | 4.83 | 4.8 | 4.64 |
|  | 1,2-dipalmitoyl-sn-glycero-3-phosphoethanolamine (DPPE) | C26H48O5P2 | -Infinity | -5.51 | -0.51 | -8.8 |
|  | Naphthyridin-8-yl)methyl]piperazin-1-yl]pyridine | C24H53N4O6P3 | -Infinity | -3.58 | -0.89 | -3.62 |
|  | (9Z)-9-Octadecenamide | C18H35NO | -Infinity | 2.83 | 0.82 | 2.79 |
|  | Ammonium heptadecanoate | C17H37NO2 | -Infinity | -2.99 | 0.96 | -2.58 |
|  | 12(13)-DiHOME | C18H34O4 | -Infinity | 3.22 | 1.62 | 2.89 |
|  | 5-nitro-2,4,6-triaminopyrimidine 1,3-dioxide | C4H6N6O4 | -Infinity | 3.47 | 3.02 | 3.66 |
|  | 11-Aminoundecanoic acid | C11H23NO2 | -Infinity | 2.3 | 2.5 | 2.23 |
|  | l-Glutamic-γ-semialdehyde | C5H9NO3 | -Infinity | 2.72 | 2.14 | 2.22 |
|  | (12Z)-9,10,11-trihydroxyoctadec-12-enoic acid | C18H34O5 | -Infinity | 1.15 | 0.27 | 1.26 |
|  | Nα,Nα′-Bis(lauroyl)-L-lysyl-L-lysyl-L-lysine | C40H78N6O6 | -Infinity | -1.26 | 0.06 | -1.92 |
|  | N,N'-Dihexyl-N''-phenylguanidine | C22H41N5 | -Infinity | -1.23 | 1.08 | -2.18 |
|  | N-(2-Hydroxyethyl)-N,N-bis(2-hydroxyethyl)octadecanamide | C28H57NO4 | -Infinity | -3 | -2.45 | -2.52 |
|  | DIBOA | C8H7NO4 | -Infinity | 2.24 | 1.88 | 2.39 |
|  | succinic acid | C8H10O6 | -Infinity | -1.84 | -2.13 | -2.01 |
| 19. | 1,2-distearoyl-sn-glycero-3-phosphoethanolamine-N-[methoxy(polyethylene glycol)-2000] | C37H64N7O8P | -Infinity | -2.63 | -0.82 | -3.4 |
| 20. | Juniperic acid | C16H32O3 | -Infinity | 1.26 | 0.32 | 1.29 |
| 21. | [(2R)-2-amino-2-(4-hydroxyphenyl)acetyl]amino]-3,3-dimethyl-7-oxo-4-thia-1-azabicyclo[3.2.0]heptane-2-carboxylic acid | C13H18N2O7 | -Infinity | 2.23 | 2.58 | 2.4 |
| 22. | N,N′-Bis(2-hydroxyethyl)-N,N′-dioctylhexanediamide | C26H54N2O3 | -Infinity | -0.14 | 0.05 | -1.11 |
| 23. | Phloionolic acid | C18H36O5 | -Infinity | -1.02 | 2.34 | -1.7 |
| 24. | 2-isopropylmaleic acid | C7H10O4 | -Infinity | -0.62 | -0.44 | -1.04 |
| 25. | 7-methylsulfinylheptyl isothiocyanate | C9H17NOS2 | -Infinity | 1.35 | 1.1 | 1.54 |
| 26. | L-Cysteine | C18H37NO | -Infinity | -1.74 | -2.09 | -1.98 |
| 27. | 1,2-Bis(di-tert-butylphosphino)ethane chloramine | C34H53ClN2P2 | -Infinity | -1.26 | 3.15 | 2.45 |
| 28. | Spermidine butylcarbamate | C21H38N4O | -Infinity | 1.43 | -1.46 | -2.73 |
| 29. | 7α-Acetoxy-6β-benzoyloxy-3β,5α,14β-trihydroxy-5β-cholan-24-oic acid | C31H42O6 | -Infinity | 2.01 | 0.41 | 1.99 |
| 30. | 1,2-dilinoleoyl-3-oleoyl-rac-glycerol) | C26H50O4 | -Infinity | -2.45 | -0.75 | -4.46 |
| 31. | 4-Amino-DL-phenylalanine | C9H12N2O2 | -Infinity | -3.41 | -3.24 | -2.57 |
| 32. | 5-[8,10-Dihydroxy-11-(hydroxymethyl)-4,7-dimethyltridecyl]-6-ethyl-4-hydroxy-4,5-dimethyl-2-cyclohexen-1-one | C26H48O5 | -Infinity | -0.68 | -1.35 | -2.94 |
| 33. | N,N-Dimethyl-N-tetradecylphosphoramidic acid | C14H35N4O2P | -Infinity | 2.52 | 2.37 | 2.22 |
| 34. | 1-Octadecyl (2Z)-2-butenedioate | C22H40O4 | -Infinity | -2.64 | -0.92 | 0.65 |
| 35. | Tris(hydroxymethyl)aminomethane | C4H11NO3 | -Infinity | -4.43 | 1.34 | 0.69 |
| 36. | Tacrolimus | C21H36N2O5 | -Infinity | -0.99 | -0.21 | -1.82 |
| 37. | Palmitic Acid | C16H32O2 | -Infinity | 1.32 | 0.1 | 1 |
| 38. | 4-(1,2-Dihydroxypropan-2-yl)-1-methylcyclohexane-1,2-diol | C10H20O4 | -Infinity | -2.35 | -0.72 | -2.04 |
| 39. | Bis(diisopropylamino)cyclophosphazene | C32H46N10P2 | -Infinity | -2.55 | -0.38 | -2.12 |
| 40. | D-Erythronolactone | C4H6O4 | -Infinity | -1.56 | -2.55 | -1.66 |
| 41. | Citric acid | C6H8O7 | -Infinity | 8.23 | 5.95 | 8.38 |
| 42. | 4-[2-(4-Benzylpiperazin-1-yl)ethyl]-1H-quinazolin-2-one | C25H26N4O2 | -Infinity | 5.59 | 2.4 | 5.33 |
| 43. | Pyruvic acid | C3H4O3 | -Infinity | 7.42 | 2.57 | 7.39 |
| 44. | 1-myristoyl-2-oleoyl-sn-glycero-3-phosphoethanolamine | C37H72NO8P | -Infinity | 0.43 | -0.32 | 3.77 |
| 45. | Tetradecyl tetraamine | C22H38N4 | -Infinity | 5.07 | 5.64 | 4.22 |
| 46. | Octabenzone | C21H26O3 | -Infinity | 3.93 | 4.61 | 6.56 |
| 47. | porphobilinogen | C10H14N2O4 | -Infinity | -0.53 | 4.06 | -0.77 |
| 48. | Tacrolimus | C30H41NO4 | -Infinity | 1.98 | -0.62 | 0.29 |
| 49. | Netilmicin | C21H41N5O7 | -Infinity | 0.27 | -4.33 | 0.03 |
| 50. | 1-Palmitoyl-2-hydroxy-sn-glycero-3-PE | C21H44NO7P | -Infinity | 2.33 | -0.34 | 0.07 |
| 51. | Galacturonic acid | C6H10O7 | -Infinity | -1.19 | 0.5 | 2.15 |
| 52. | N,N-Dioctadecylhydroxylamine | C24H50N2O | -Infinity | -0.13 | -0.22 | -0.7 |
| 53. | Glycine | C27H53NO3 | -Infinity | -1.46 | -2.19 | -1.78 |
| 54. | 1,2-dioleoyl-sn-glycero-3-phosphoethanolamine | C23H45N2OP3 | -Infinity | 4.23 | 8.36 | 4.2 |
| 55. | Myristyl sulfate | C14H30O4S | -Infinity | 0 | -0.96 | -0.38 |
| 56. | Phosphatidylethanolamine | C38H71N5O3P2 | -Infinity | 0.78 | 1.16 | -0.46 |
| 57. | [Similar to: N1-{5-[(4-chlorophenyl)thio]-4-fluoro-2-nitrophenyl}acetamide; ΔMass: 0.1994 Da] | C19H32O3S | -Infinity | -0.7 | -0.46 | 0.32 |
| 58. | L-Glutamic acid | C5H9NO4 | -Infinity | -1.01 | -2.46 | -1.61 |
| 59. | 1-Hexadecanoylpyrrolidine | C20H39NO | -Infinity | 0.61 | 0.46 | 0.23 |
| 60. | pyrophosphoric acid | C4H4O7P2 | -Infinity | -1.91 | -1.03 | -1.95 |
| 61. | PC(18:1/0:0) | C26H52NO7P | -Infinity | 0.36 | 6.17 | -2.21 |
| 62. | Mesaconic acid | C5H6O4 | -Infinity | 4.24 | 3.94 | 4.32 |
| 63. | Stearylamine oxide or N-Stearyl-1-hydroxy-2-amino-propane | C29H57NO3 | -Infinity | 0.06 | 3.02 | -0.06 |
| 64. | butoctamide | C16H29NO5 | -Infinity | -0.94 | -0.17 | -0.85 |
| 65. | 12(13)-DiHOME | C18H34O4 | -Infinity | 3.53 | 2.57 | 2.3 |
| 66. | D-α-Tocopherol succinate | C26H45NO4 | -Infinity | 0.34 | 6.29 | 7.13 |
| 67. | beta-Alanine | C18H34O5 | -Infinity | -2.13 | -3.63 | -2.43 |
| 68. | 1,2-distearoyl-sn-glycero-3-phosphoethanolamine | C38H77NO7P2 | -Infinity | 4.61 | 2.4 | 6.14 |
| 69. | 12(13)-DiHOME | C18H34O4 | -Infinity | -1.48 | -1.24 | 0.56 |
| 70. | maltotetraose | C24H46O13 | -Infinity | 1.81 | 3.8 | 0.59 |
| 71. | D-glucosamine N-palmitoyl-6-O-phosphono-D-glucose | C29H55NO8 | -Infinity | 7.11 | 7.08 | 6.08 |
| 72. | Amide C18 | C18H37NO | -Infinity | -0.04 | -5.22 | -4.17 |
| 73. | Spermidine | C17H30N4O5 | -Infinity | 2.04 | 2.3 | 2.38 |
| 74. | 9(10)-DiHOME | C18H34O4 | -Infinity | 1.35 | -1.08 | 0.83 |
| 75. | N-(2-Hydroxyethyl)hexadecanamide | C23H45NO3 | -Infinity | 0 | -0.2 | -8.01 |
| 76. | Rhamnolipid Rha-C10-C10 | C33H63NO10 | -Infinity | 6.92 | 6.94 | 6.94 |
| 77. | N,N'-Bis(2-hydroxyethyl)hexadecane-1,16-diamine | C25H52N2O | -Infinity | -0.05 | -0.17 | -0.63 |
| 78. | Purine-2,6-dione, 1,3-dimethyl-7-(2-nitroethyl) | C4H4N6O5 | -Infinity | -1.13 | 2.32 | -1.33 |
| 79. | Alanine | C22H43NO | -Infinity | -0.91 | -1.98 | -1.03 |
| 80. | 9,10-Dihydroxystearic acid | C18H36O4 | -Infinity | 1.15 | -0.45 | -0.38 |
| 81. | 9(10)-DiHOME | C18H34O4 | -Infinity | 7.51 | 6.57 | 7.56 |
| 82. | Isonicotinyl hydrazide | C17H33N5O5 | -Infinity | 0.09 | 0.25 | -0.07 |
| 83. | 12(13)-DiHOME | C18H34O4 | -Infinity | 1.26 | 0.62 | -0.43 |
| 84. | Pyridoxine | C8H11NO3 | -Infinity | -0.67 | -0.74 | -0.93 |
| 85. | N-oleoyl ethanolamine | C19H41NO4 | -Infinity | -0.92 | 0.97 | -1 |
| 86. | Fosphenytoin | C12H13N2O2P | -Infinity | 6.66 | 2.91 | 6.27 |
| 87. | Cholesteryl hemisuccinate | C27H47NO4 | -Infinity | -0.8 | -0.56 | 0.3 |
| 88. | (9S,10R,11E,13S)-9,10,13-Trihydroxy-11-octadecenoic acid | C18H34O5 | -Infinity | 0.75 | 3.96 | 0.87 |
| 89. | Phosphoric acid | H3O4P | -Infinity | 3.43 | 2.99 | 2.68 |
| 90. | biotin | C10H16N2O3S | -Infinity | -0.83 | -0.41 | -0.98 |
| 91. | Estra-1,3,5(10)-triene-3,6α,17β-triol triacetate | C24H30O6 | -Infinity | 0.38 | 3.6 | 0.53 |
| 92. | Spermidine | C16H30N6O2 | -Infinity | -3.34 | -1.05 | -1.43 |
| 93. | 9,10-Dihydroxystearic acid | C18H36O4 | -Infinity | -0.76 | 1.48 | -1.21 |
| 94. | N,N-Dimethylhexadecylamine | C25H53N | -Infinity | -1.44 | -0.88 | 0.31 |
| 95. | 2-Oleoylglycerol | C21H40O4 | -Infinity | 2.42 | 3.65 | 2.85 |
| 96. | N,N′-Diacetyl-Lactosyl-Dioleoyl-Sn-Glycerol | C31H54N2O9 | -Infinity | 2.48 | 1.48 | 1.58 |
| 97. | Adenosine 5'-diphosphate (ADP) | C24H53N9O3P2 | -Infinity | 3.98 | 3.25 | 4.39 |
| 98. | glyceryl monostearate | C20H38O4 | -Infinity | -0.35 | 2.92 | 2.99 |
| 99. | Dioctyldimethylammonium chloride | C18H39N | -Infinity | -0.43 | -0.08 | -0.73 |
| 100. | 2-Furoic acid | C5H4O3 | -Infinity | 8.65 | 6.99 | 8.75 |
| 101. | Fingolimod phosphate | C17H36N2O7P2S | -Infinity | 2.28 | 2.13 | 2.37 |
| 102. | NP-022531 | C20H34O3 | -Infinity | 3.04 | 3.83 | 3.85 |
| 103. | Stearoylglycine | C20H39NO3 | -Infinity | 3.46 | 3.33 | 2.8 |
| 104. | NP-013663 | C18H34O5 | -Infinity | -4.41 | -1.89 | -2.52 |
| 105. | 9(10)-DiHOME | C18H34O4 | -Infinity | 5.68 | 5.37 | 3.69 |
| 106. | Adenosine Triphosphate | C8H13N2O9P3 | -Infinity | 0.12 | -0.61 | 0.02 |
| 107. | thiol or disulfide derivative | C29H38OS2 | -Infinity | 5.06 | 5.7 | 4.86 |
| 108. | 1,2-dihydroxyethyl]-3,4-dihydroxyfuran-2(5H)-one | C8H10O7 | -Infinity | 3.19 | 2.9 | 3.25 |
| 109. | Purine-2,6-dione, 1,3-dimethyl-7-(2-nitrophenyl) | C12H7N5O2 | -Infinity | -0.19 | -2.57 | -0.22 |
| 110. | Sodium Adenosine Triphosphate | C21H22N10 | -Infinity | -2.61 | -2.65 | -3.47 |
| 111. | L-(+)-Erythrulose | C4H8O4 | -Infinity | 2.37 | -0.54 | 2.4 |
| 112. | Ricinoleic Acid | C18H34O3 | -Infinity | 1.91 | 1.68 | 1.8 |
| 113. | docosanol | C22H40O | -Infinity | -0.01 | -0.33 | -0.76 |
| 114. | (±)-Tartaric acid | C4H6O6 | -Infinity | 1.55 | -1.86 | 2.65 |
| 115. | 2,3-dihydroxypropyl 12-methyltridecanoate | C17H34O4 | -Infinity | -1.34 | 0.41 | -0.74 |
| 116. | Adenosine 5'-(tetrahydrogen triphosphate) | C35H54OS3 | -Infinity | -1.74 | -1.62 | -2.43 |
| 117. | PC(16:0/0:0) | C24H50NO7P | -Infinity | -0.03 | 3.2 | -0.17 |
| 118. | Crotonic acid | C4H6O2 | -Infinity | 3.87 | 3.36 | 3.98 |
| 119. | Guanidine dicyanamide | C2H2N6 | -Infinity | -1.17 | -0.36 | -0.86 |
| 120. | Adenosine monophosphate (AMP) | C6H8N9O2P | -Infinity | -1.37 | -1.36 | -2.49 |
| 121. | N-tetracosylamine | C24H47NO | -Infinity | -0.07 | -0.4 | -0.85 |
| 122. | 1-O-Arsonopentofuranose | C5H11AsO8 | -Infinity | 4.95 | 3.35 | 5.57 |
| 124. | Sulfamethoxazole | C21H38N4O4S | -Infinity | 3.65 | 2.74 | 3.33 |
| 125. | 1-(1Z-hexadecenyl)-sn-glycero-3-phosphocholine | C24H50NO6P | -Infinity | 0.11 | 0.09 | -1.64 |
| 126. | Sorbitan monolaurate sulfate | C20H42O7S | -Infinity | 0.05 | -1.63 | -0.6 |
| 127. | Oleic Acid | C18H34O2 | -Infinity | 1.31 | -0.52 | 1.15 |
| 128. | Glycerol triphosphate | C9H17O7P3 | -Infinity | -0.54 | -1.35 | -0.29 |
| 129. | Glycine | C20H41NO4 | -Infinity | 3.36 | 2.11 | 3.06 |
| 130. | pyridyldithio propionate | C39H71N7OP2 | -Infinity | -2.36 | 1.67 | 1.68 |
| 131. | phosphatidylglycerol triphosphate | C26H53O4P3 | -Infinity | 0.07 | -0.02 | -0.18 |
| 132. | N-Docosanoyl-L-ornithine | C22H43NO2 | -Infinity | 0.68 | 0.34 | -0.1 |
| 133. | dilauroyl peroxide | C24H46O4 | -Infinity | -1.77 | -0.94 | 0.08 |
| 134. | Thiolutin | C16H30N4OS | -Infinity | -0.17 | -0.66 | -0.15 |
| 135. | Azathioprine | C5H6N6O5 | -Infinity | -0.05 | 0.75 | -1.35 |
| 136. | DINP | C26H42O4 | -Infinity | -1.66 | -1.39 | -1.22 |
| 137. | Fosphenytoin | C27H42N5O5P | -Infinity | 4.39 | 0.99 | 2.64 |
| 138. | 1,2-dimyristoyl-sn-glycero-3-phosphoethanolamine | C25H53N4O5P | -Infinity | -0.23 | -0.26 | -0.06 |
| 139. | Stearamidopropyl Dimethylamine | C20H41NO4 | -Infinity | -1.38 | 0.08 | 0.7 |
| 140. | DINP | C26H42O4 | -Infinity | 1 | 0.36 | 1.5 |
| 141. | Palmitelaidic acid | C16H30O2 | -Infinity | 1.27 | -0.56 | 2.62 |
| 142. | 14-methylhexadecanoyl)pyrrolidine | C21H45N7O5 | -Infinity | -0.25 | 0.01 | -4.01 |
| 143. | Lapatinib | C24H36N6O2 | -Infinity | -1.31 | -0.77 | -0.4 |
| 144. | N-Octadecyl-N,N-bis(2-mercaptoethyl)amine | CH2N2O6P2S | -Infinity | 0.19 | 1.31 | 0.1 |
| 145. | N-Eicosylamine | C9H15N8O9P | -Infinity | 4.11 | 0.43 | 3.81 |
| 146. | Fusidic acid 3-phosphate | C14H25NO4 | -Infinity | -0.79 | -0.21 | -1.03 |
| 147. | 12-HSA | C18H36O3 | -Infinity | -4.27 | 1.19 | 1.07 |
| 148. | N-oleylglycine | C22H41NO2 | -Infinity | 3.46 | 2.86 | 2.95 |
| 149. | phospholipid derivative | C24H54N9OP | -Infinity | -0.27 | -0.11 | 0.11 |
| 150. | Hydrogen bromide | HBr | -Infinity | 1.2 | 0.63 | 1.45 |
| 151. | 1,2-dioleoyl-sn-glycero-3-phosphoethanolamine | C30H68N6O2P2 | -Infinity | 0.21 | -0.78 | -0.09 |
| 152. | Ethylenediaminetetraacetic acid | C10H16N2O8 | -Infinity | -1.38 | -1.17 | -1.01 |
| 153. | trialkyl phosphite | C26H55O2P3 | -Infinity | -0.21 | -0.2 | -0.06 |
| 154. | Hexamethylenetetramine | C16H30N6O2 | -Infinity | 0.02 | 0.22 | -0.77 |
| 155. | 1-(14-methylhexadecanoyl)pyrrolidine | C21H41NO | -Infinity | 0.33 | -0.11 | 1.78 |
| 156. | Biotinylated dithiothreitol | C23H30ClN7O2S2 | -Infinity | -0.72 | -0.8 | -0.92 |
| 157. | Spermidine triacetate | C32H65NOS2 | -Infinity | -0.33 | -0.24 | 0.22 |
| 158. | 2-Phosphoglyceric acid 2-phosphate | C20H41NO | -Infinity | 0.12 | 0.13 | -0.23 |
| 159. | Adenosine diphosphate (ADP) | C24H50N2O7 | -Infinity | -1.23 | 0.24 | 1 |
| 160. | Cyclosporine A | C40H71N2O13P3 | -Infinity | -0.19 | 3.31 | -1.4 |
| 161. | 4-hydroxymephenytoin | C22H46O8S | -Infinity | 0.03 | -1.27 | -0.71 |
| 162. | Phosphocreatine | C20H40N7O7P | -Infinity | 2.18 | -0.68 | 0.1 |
| 163. | Stearamide | C26H52N3O5P | -Infinity | -0.07 | 0.15 | -0.03 |
| 164. | Dipalmitoyl disulfide | C30H56NP3 | -Infinity | 2.22 | 3.87 | 1.52 |
| 165. | Adenosine triphosphate (ATP) | C17H40N2OP2S | -Infinity | -0.98 | -0.63 | -1.68 |
| 166. | Fumarylacetoacetic acid | C8H8O6 | -Infinity | 1.56 | 1.76 | 2 |
| 167. | Creatine | C19H33N5 | -Infinity | -2.83 | -2.43 | -1.02 |
| 168. | Albendazole sulfoxide | C29H47N7O4S | -Infinity | 0.96 | 1.64 | -1.71 |
| 169. | Adenylyl sulfate diphosphate | C23H42N6O | -Infinity | -0.42 | -0.41 | -0.53 |
| 170. | Amide C22 | C22H45NO | -Infinity | 0.01 | -0.21 | -0.64 |
| 171. | C27H42N2O2S3 | C27H42N2O2S3 | -Infinity | -0.11 | 0.02 | -0.41 |
| 172. | C23H42N6O3 | C23H42N6O3 | -Infinity | -1.14 | -0.13 | 0.89 |
| 173. | C5H6O6P2S | C5H6O6P2S | -Infinity | -1.59 | 0.47 | -0.23 |
| 174. | C9H19N4O10P | C9H19N4O10P | -Infinity | -0.25 | 0.51 | -0.46 |
| 175. | C17H24N4S | C17H24N4S | -Infinity | 3.33 | 2.69 | 3.29 |
| 176. | C28H49N5O2 | C28H49N5O2 | -Infinity | -0.29 | -0.36 | -0.12 |
| 177. | 4-hydroxymephenytoin | C12H14N2O3 | -Infinity | -0.01 | 0.21 | -0.61 |
| 178. | (Diphenylphosphinothioyl)chloride | C5H3O9P3 | -Infinity | -0.5 | 1.02 | 0 |
| 179. | Di-n-octylamine oxide | CH3N2O10P | -Infinity | 1.15 | 1.47 | 0.89 |
| 180. | D-Glucose-1,6-bisphosphate | C23H45NO | -Infinity | 2.37 | 0.31 | 2.85 |
| 181. | Erlotinib hydrochloride | C18H38OS2 | -Infinity | 2.1 | 2.52 | 0.41 |
| 182. | 3a,7a-Dihydroxycholanoic acid | C24H40O4 | -Infinity | 4.06 | 3.57 | 3.87 |
| 183. | phosphatidic acid | C18H38N2O | -Infinity | 3.54 | 3.82 | 3.54 |
| 184. | Sphingosine | C48H66NP | -Infinity | -1.79 | -1.56 | 0.46 |
| 185. | 1,25-Diamino-9,15,21-trimethylhexacosane | C19H35N2O2P | -Infinity | 0.08 | -0.65 | -0.6 |
| 186. | O,O-Diethyl O-(N-methylcarbamoyl)phosphorothioate | C35H72NO14PS | -Infinity | 3.03 | 3.57 | 2.87 |
| 187. | (Decanoyloxy)-3-hydroxy-2-propanyl tridecanoate | C7H12N2O13P2S | -Infinity | 0.88 | 3.07 | 1.29 |
| 188. | Cholesteryl chloride | C34H53NO5S | -Infinity | -0.57 | -0.15 | -1.03 |
| 189. | 1,3,5-Triazine-2,4,6-triamine, N,N''-bis(1-methylethyl)-N,N''-bis(2-propenyl) | C5H3N4O7P3 | -Infinity | -1.04 | 0.31 | -0.48 |
| 190. | 1,2-dioleoyl-3-trimethylammonium-propane | C28H63N9O5S | -Infinity | -0.3 | -0.84 | -0.3 |
| 191. | Spermine phosphate | C27H53N2O4P | -Infinity | -3.33 | 0.45 | 0.41 |
| 192. | Spermine | C25H49N2O2P | -Infinity | -1.66 | -2.63 | -1.62 |
| 193. | 1,2-dipalmitoyl-sn-glycero-3-phosphate | C46H82N4O3 | -Infinity | -0.51 | -0.48 | -0.95 |
| 194. | N,N'-dioctadecyl ethylenediamine oxide | C20H44N6OS | -Infinity | -0.94 | -0.12 | 0.58 |
| 195. | THREO-SPHINGOSINE, (−)- | C18H37NO2 | -Infinity | -0.11 | 0.52 | 0.14 |
| 196. | N,N'-Didodecylurea | C24H50N2O2 | -Infinity | 0.55 | 0.06 | -0.09 |
| 197. | 12-HSA | C18H36O3 | -Infinity | 0.29 | 0.78 | 0.06 |
| 198. | 5,13-Dihydroxy-6,10-dimethyl-5-[(4-pyridin-2-ylpiperazin-1-yl)methyl]-5,6,7,8,9,10,11,12-octahydro-1H-benzo[a]heptalen-3-yl 2,2-dimethylpropanoate | C39H49N3O4 | -Infinity | -0.19 | 0.25 | -0.37 |
| 199. | Spermine-N-(butylthio)carboxamide | C13H34N10S | -Infinity | 0.42 | -0.67 | 0.44 |
| 200. | 2,4-dihydroxyheptadec-16-enyl acetate | C19H36O4 | -Infinity | 0.21 | -0.63 | 0.77 |
| 201. | Tris(trimethylphosphine) | C20H20ClPS2 | -Infinity | 3.39 | 2.98 | 3.15 |
| 202. | (1,2-dioleoyl-3-trimethylammonium-propane) | C24H48N2O | -Infinity | -0.06 | -0.35 | -0.99 |
| 203. | Ergothioneine | C31H69N4P | -Infinity | 0.06 | 0.1 | -0.09 |
| 204. | sulfadiazine | C20H47N4PS2 | -Infinity | 2.17 | 2.38 | 2.05 |
| 205. | bis(4-Octylphenyl)amine | C9H22O13P2 | -Infinity | 0.76 | 1.65 | 0.71 |
| 206. | Dapsone | C22H34N4 | -Infinity | 0 | 0.54 | -2.3 |
| 207. | Lysophosphatidylcholine | C33H30ClN5S | -Infinity | -0.83 | -0.8 | -1.01 |
| 208. | imethyldioctadecylammonium bromide (DODAB) | C28H57NO4 | -Infinity | -2.67 | -0.84 | -2.18 |
| 209. | Sulfamethazine | C30H63O2P3 | -Infinity | -0.46 | -0.08 | 0.25 |
| 210. | N-(2,6-dimethylphenyl)-N-(2-hydroxy-1-methylpropyl)glycinamide | C31H55NO3 | -Infinity | -0.3 | -0.21 | -0.03 |
| 211. | dehydroeburicoic acid | C25H52N2O2 | -Infinity | 1.01 | 0.23 | 0.21 |
| 212. | Fingolimod hydrochloride | C14H29N4O2PS | -Infinity | -1.21 | -0.48 | 0.17 |
| 213. | (2S)-1-(Decanoyloxy)-3-hydroxy-2-propanyl tridecanoate | C26H50O5 | -Infinity | 0.38 | -0.36 | -0.29 |
| 214. | alloxan | C41H73Cl | -Infinity | -0.07 | 0.18 | 0.12 |
| 215. | 1,3,5-Triazine-2,4,6-triamine, N,N''-bis(1-methylethyl)-N,N''-bis(2-propenyl) | C18H26N10 | -Infinity | -0.27 | 0.6 | -0.67 |
| 216. | 1,2-dioleoyl-3-trimethylammonium-propane | C19H46N9OP | -Infinity | -0.37 | 0.56 | 0.84 |
| 217. | Spermine phosphate | C21H50N9OP | -Infinity | 0.11 | 0.22 | 0.13 |
| 218. | Spermine | C18H45N7O6 | -Infinity | 0.02 | 0.05 | -0.07 |
| 219. | 1,2-dipalmitoyl-sn-glycero-3-phosphate | C23H46O7P2 | -Infinity | -0.46 | -0.42 | -0.46 |
| 220. | N,N'-dioctadecyl ethylenediamine oxide | C26H54N2O | -Infinity | -0.36 | -0.83 | -1.28 |
| 221. | Tocopheryl acetate | C31H52O3 | -Infinity | -0.26 | -0.29 | -0.02 |
| 222. | Adenosine 5′-O-(3-thiotriphosphate) | C3H3N8O8P3S2 | -Infinity | 0.07 | 2.43 | -0.92 |
| 223. | (2S)-1-[(2S)-6-amino-2-[[(1S)-1-carboxy-3-phenylpropyl]amino]hexanoyl]pyrrolidine-2-carboxylic acid | C21H40N2O4 | -Infinity | -0.26 | -0.44 | -0.33 |
| 224. | Cyclosporine A | C62H75N5O3S | -Infinity | -0.64 | -0.37 | -2.28 |
| 225. | N-Hexacosanoylglycine | C25H55N7O3 | -Infinity | -3.49 | -0.16 | 0.42 |
| 226. | C14-Dihydroceramide | C32H65NO3 | -Infinity | -0.13 | -0.51 | -0.08 |
| 227. | Sildenafil | C21H32N10 | -Infinity | 2.64 | 2.66 | 2.79 |
| 228. | Thioridazine | C25H52N6S2 | -Infinity | 0.86 | -1.18 | 0.32 |
| 229. | Tris(trimethylphosphine) | C15H35P3 | -Infinity | -1 | -0.51 | -1.63 |
| 230. | Amide C18 | C18H37NO | -Infinity | -0.72 | -0.95 | -0.42 |
| 231. | (1,2-dioleoyl-3-trimethylammonium-propane) | C28H62N9OP | -Infinity | 0.03 | -0.23 | 0.45 |
| 232. | Ergothioneine | C46H62N6S2 | -Infinity | -1.28 | -0.42 | -2.76 |
| 233. | Clarithromycin thiosemicarbazone | C4H9ClN10S | -Infinity | -0.61 | -0.2 | 0.25 |
| 234. | bis(4-Octylphenyl)amine | C28H43N | -Infinity | -0.4 | 0.29 | -0.41 |
| 235. | Dapsone | C27H44N2S2 | -Infinity | -0.27 | -0.33 | -0.23 |
| 236. | Lysophosphatidylcholine | C25H51NO4 | -Infinity | -1.48 | -0.6 | -0.45 |
| 237. | imethyldioctadecylammonium bromide (DODAB) | C21H46N2O | -Infinity | -0.11 | 0 | -0.3 |
| 238. | Sulfamethazine | C20H44N6O2S | -Infinity | -1.08 | -0.81 | -0.97 |
| 239. | Acrylamide | C25H46N2O4 | -Infinity | -0.8 | -2.64 | 0.07 |
| 240. | dehydroeburicoic acid | C31H48O3 | -Infinity | -1.47 | -1.26 | 0.4 |
| 241. | Fingolimod hydrochloride | C21H41ClN4S | -Infinity | -0.13 | -0.14 | -0.48 |
| 242. | Clonazolam | C23H28ClNOS | -Infinity | 1.85 | 0.6 | 1.9 |
| 243. | alloxan | C4H2N2O4 | -Infinity | 0.09 | 0.12 | -0.1 |
| 244. | N,N'-dioctadecyl-ethylenediamine oxide | C25H50N2O | -Infinity | 0.22 | 0.05 | -1.01 |
| 245. | etraalkylated amines | C22H34N4 | -Infinity | -0.29 | -0.38 | -0.04 |
| 246. | Adenosine diphosphate | C11H24N2O11P2 | -Infinity | 1.1 | 0.96 | 1.32 |
| 247. | 1-bromo-3,3,3-triphenyl-1,2-diphosphirane | C14H17BrN2P2 | -Infinity | 1.49 | 1.74 | 1.73 |
| 248. | 4,4′-Methylenebis(2,6-di-tert-butylphenol) | C29H44O2 | -Infinity | 0.03 | 0.34 | 0.54 |
| 249. | chlorinated phosphatidylcholine | C48H64ClN2OP3 | -Infinity | -0.26 | 0.23 | -0.03 |
| 250. | N-Hexacosanoylglycine | C28H55NO3 | -Infinity | -0.32 | -0.03 | -0.75 |
| 251. | N-oleoyl ethanolamine (OEA) | C26H55NO3 | -Infinity | 1.79 | 1.63 | 1.43 |
| 252. | Istamycin A | C17H35N5O5 | -Infinity | -1.29 | -0.72 | -1.15 |
| 253. | Tenofovir disoproxil fumarate | C18H39N10O4P | -Infinity | 2.39 | 1.27 | 1.36 |
| 254. | C16-Dihydroceramide | C34H69NO3 | -Infinity | 0.1 | -0.67 | -0.72 |
| 255. | 1,2-diacyl-sn-glycero-3-phosphoethanolamine | C36H65NO6P2 | -Infinity | -1.57 | 3.2 | -0.3 |
| 256. | (2R)-1-(Palmitoyloxy)-3-(phosphonooxy)-2-propanyl (6Z,9Z,12Z)-6,9,12-octadecatrienoate | C37H67O8P | -Infinity | -0.43 | -0.28 | -4.04 |
| 257. | Tetraoctylammonium bromide | C25H42N4 | -Infinity | 0 | -0.24 | -0.24 |
| 258. | Dibutyl sebacate | C18H34O4 | -Infinity | 0.04 | 0.58 | -0.74 |
| 259. | Acetoacetate | C28H48O6 | -Infinity | -2.53 | -2.67 | -1.83 |
| 260. | Adenosine 5'-monophosphate | C23H50N9P | -Infinity | -1.26 | -0.39 | -1.38 |
| 261. | 5-(2-Aminopropyl)-2-methoxybenzenesulfonamide hydrochloride | C10H17ClN2O3S | -Infinity | -0.65 | 1.07 | -0.86 |
| 262. | Methyl α-D-glucopyranoside uronic acid | C11H14O9 | -Infinity | 0.08 | 1.63 | 1.05 |
| 263. | 25-(4-[(4-Methylpiperazin-1-yl)methyl]-1,3-oxazol-2-yl)-13,15,17-trihydroxy-12,16,18,20,22-pentamethyl-11,23-epoxy-1,6,10,21-tetraazapentacyclo[18.4.0.0²,⁷.0⁹,¹⁴.0¹³,¹⁸]tricosa-9,18,20,22-tetraene-5,24-dione | C28H47ClN10S2 | -Infinity | -1.45 | 0.09 | -0.96 |
| 264. | guanosine 5′-triphosphate | C5H7N8O6P3 | -Infinity | 0.26 | 0.46 | 0.32 |
| 265. | Sedoheptulose 7-phosphate | C7H15O10P | -Infinity | 0.15 | 3.69 | -0.18 |
| 266. | Sulfamethazine hydrochloride | C2H7ClN6O3S | -Infinity | -1.38 | -1.05 | -1.66 |
| 267. | Sodium metaborate | C4H8N4O14 | -Infinity | 2.48 | 3.18 | 2.73 |
| 268. | benzyl chlorocarbonate | C7H15Cl3N6 | -Infinity | 0.12 | -0.59 | -2.24 |
| 269. | Acrylamide | C5H10N8O3P2 | -Infinity | 0.03 | 0.05 | 0.61 |
| 270. | ethylamino(sulfamoyl)amino]-1-hydroxyethane | CHN4O13P3 | -Infinity | 0.23 | 3.47 | 0.44 |
| 271. | L-Alanine | C3H7NO2 | -Infinity | 2.33 | -0.34 | 0.07 |
| 272. | Cis-Aconitric acid | C5H11NO2 | -Infinity | -1.98 | -3.37 | -2.61 |
| 273. | L-Leucine | C6H13NO2 | -Infinity | -0.98 | -2.92 | -1.03 |
| 274. | L-Isoleucine | C6H13NO2 | -Infinity | -0.03 | 2.91 | -0.24 |
| 275. | L-Threonine | C4H9NO3 | -Infinity | -2.17 | -2.69 | -1.06 |
| 276. | L-Methionine | C5H11NO2S | -Infinity | 0 | -0.96 | -0.38 |
| 277. | L-Phenylalanine | C9H11NO2 | -Infinity | 0.78 | 1.16 | -0.46 |
| 278. | L-Tyrosine | C9H11NO3 | -Infinity | -1.12 | -2.67 | -1.67 |
| 279. | L-Tryptophan | C11H12N2O2 | -Infinity | 5.49 | 4.4 | 5.58 |
| 280. | L-Serine | C3H7NO3 | -Infinity | -2.76 | -2.83 | -1.82 |
| 281. | L-Proline | C5H9NO2 | -Infinity | -1.91 | -1.03 | -1.95 |
| 282. | L-Glutamine | C5H10N2O3 | -Infinity | -3.06 | -3.26 | -2.89 |
| 283. | L-Glutamate | C5H9NO4 | -Infinity | 4.24 | 3.94 | 4.32 |
| 284. | L-Aspartate | C4H7NO4 | -Infinity | 0.06 | 3.02 | -0.06 |
| 285. | L-Histidine | C6H9N3O2 | -Infinity | -0.94 | -0.17 | -0.85 |
| 286. | L-Lysine | C6H14N2O2 | -Infinity | 3.53 | 2.57 | 2.3 |
| 287. | L-Arginine | C6H14N4O2 | -Infinity | 0.34 | 6.29 | 7.13 |
| 288. | Dimethylglycine | C6H13N3O3 | -Infinity | -2.92 | -2.86 | -1.21 |
| 289. | Ornithine | C5H12N2O2 | -Infinity | 4.61 | 2.4 | 6.14 |
| 290. | N-Acetylglutamate | C7H11NO5 | -Infinity | -1.48 | -1.24 | 0.56 |
| 291. | Pyruvate | C3H4O3 | -Infinity | -1.03 | -2.62 | -1.53 |
| 292. | Lactate | C3H6O3 | -Infinity | 7.11 | 7.08 | 6.08 |
| 293. | Acetyl-CoA | C23H38N7O17P3S | -Infinity | -0.04 | -5.22 | -4.17 |
| 294. | Succinyl-CoA | C25H40N7O19P3S | -Infinity | 2.04 | 2.3 | 2.38 |
| 295. | Succinate | C4H6O4 | -Infinity | 1.35 | -1.08 | 0.83 |
| 296. | Fumarate | C4H4O4 | -Infinity | -3.06 | -3.26 | -2.89 |
| 297. | Malate | C4H6O5 | -Infinity | 6.92 | 6.94 | 6.94 |
| 298. | Oxaloacetate | C4H4O5 | -Infinity | -0.05 | -0.17 | -0.63 |
| 299. | α-Ketoglutarate | C5H6O5 | -Infinity | -1.13 | 2.32 | -1.33 |
| 300. | Phytosphingosine | C6H8O7 | -Infinity | -2.93 | -2.63 | -1.52 |
| 301. | Isocitrate | C6H8O7 | -Infinity | 1.15 | -0.45 | -0.38 |
| 302. | ATP | C10H16N5O13P3 | -Infinity | 7.51 | 6.57 | 7.56 |
| 303. | ADP | C10H15N5O10P2 | -Infinity | 0.09 | 0.25 | -0.07 |
| 304. | AMP | C10H14N5O7P | -Infinity | 1.26 | 0.62 | -0.43 |
| 305. | GTP | C10H16N5O14P3 | -Infinity | -0.67 | -0.74 | -0.93 |
| 306. | GDP | C10H15N5O11P2 | -Infinity | -0.92 | 0.97 | -1 |
| 307. | GMP | C10H14N5O8P | -Infinity | 6.66 | 2.91 | 6.27 |
| 308. | CTP | C9H16N3O14P3 | -Infinity | -0.8 | -0.56 | 0.3 |
| 309. | CDP | C9H15N3O11P2 | -Infinity | 0.75 | 3.96 | 0.87 |
| 310. | CMP | C9H14N3O8P | -Infinity | 3.43 | 2.99 | 2.68 |
| 311. | UTP | C9H15N2O15P3 | -Infinity | -0.83 | -0.41 | -0.98 |
| 312. | UDP | C9H14N2O11P2 | -Infinity | 0.38 | 3.6 | 0.53 |
| 313. | UMP | C9H13N2O9P | -Infinity | -3.34 | -1.05 | -1.43 |
| 314. | NAD+ | C21H27N7O14P2 | -Infinity | -0.76 | 1.48 | -1.21 |
| 315. | NADH | C21H28N7O14P2 | -Infinity | -1.44 | -0.88 | 0.31 |
| 316. | NADP+ | C21H28N7O17P3 | -Infinity | 2.42 | 3.65 | 2.85 |
| 317. | NADPH | C21H29N7O17P3 | -Infinity | 2.48 | 1.48 | 1.58 |
| 318. | FAD | C27H33N9O15P2 | -Infinity | 3.98 | 3.25 | 4.39 |
| 319. | FMN | C17H21N4O9P | -Infinity | -0.35 | 2.92 | 2.99 |
| 320. | Mycolic acid (C60) | C60H120O4 | -Infinity | -0.43 | -0.08 | -0.73 |
| 321. | Trehalose | C12H22O11 | -Infinity | 8.65 | 6.99 | 8.75 |
| 322. | Trehalose monomycolate (TMM) | C72H138O11 | -Infinity | 2.28 | 2.13 | 2.37 |
| 323. | Trehalose dimycolate (TDM) | C132H254O13 | -Infinity | 3.04 | 3.83 | 3.85 |
| 324. | Phosphatidylethanolamine (PE 16:0/18:1) | C41H78NO8P | -Infinity | 3.46 | 3.33 | 2.8 |
| 325. | Phosphatidylinositol mannoside (PIM) | C66H122O22P | -Infinity | -4.41 | -1.89 | -2.52 |
| 326. | Lipoarabinomannan (LAM) | Large polymer (variable) | -Infinity | 5.68 | 5.37 | 3.69 |
| 327. | Sulfolipid-1 | C77H148O10S | -Infinity | 0.12 | -0.61 | 0.02 |
| 328. | Diacylglycerol | C21H42O4 | -Infinity | 5.06 | 5.7 | 4.86 |
| 329. | Triacylglycerol | C55H98O6 | -Infinity | 3.19 | 2.9 | 3.25 |
| 330. | Glucose | C6H12O6 | -Infinity | -0.19 | -2.57 | -0.22 |
| 331. | Fructose | C6H12O6 | -Infinity | 2.01 | 3.39 | 0.56 |
| 332. | Ribose | C5H10O5 | -Infinity | 2.37 | -0.54 | 2.4 |
| 333. | Mannose | C6H12O6 | -Infinity | 1.91 | 1.68 | 1.8 |
| 334. | Galactose | C6H12O6 | -Infinity | -0.01 | -0.33 | -0.76 |
| 335. | Xylose | C5H10O5 | -Infinity | 1.55 | -1.86 | 2.65 |
| 336. | Arabinose | C5H10O5 | -Infinity | -1.34 | 0.41 | -0.74 |
| 337. | Glucose-6-phosphate | C6H13O9P | -Infinity | -0.69 | -0.35 | -5.25 |
| 338. | Fructose-1,6-bisphosphate | C6H14O12P2 | -Infinity | -0.03 | 3.2 | -0.17 |
| 339. | Ribulose-5-phosphate | C5H11O8P | -Infinity | 3.87 | 3.36 | 3.98 |
| 340. | Glutathione (GSH) | C10H17N3O6S | -Infinity | -1.17 | -0.36 | -0.86 |
| 341. | Coenzyme A | C21H36N7O16P3S | -Infinity | 0.35 | 0.65 | 0.75 |
| 342. | Acyl-carrier protein intermediate | Variable | -Infinity | -0.07 | -0.4 | -0.85 |
| 343. | Heme | C34H32FeN4O4 | -Infinity | 4.95 | 3.35 | 5.57 |
| 344. | cAMP | C10H12N5O6P | -Infinity | 3.65 | 2.74 | 3.33 |
| 345. | cGMP | C10H12N5O8P | -Infinity | 0.11 | 0.09 | -1.64 |
| 346. | Phosphoenolpyruvate | C3H5O6P | -Infinity | -1.03 | -1.63 | -0.6 |
| 347. | 3-Phosphoglycerate | C3H7O7P | -Infinity | 1.31 | -0.52 | 1.15 |
| 348. | 2-Phosphoglycerate | C3H7O7P | -Infinity | -0.54 | -1.35 | -0.29 |
| 349. | β-alanine | C3H7NO2 | -Infinity | 3.36 | 2.11 | 3.06 |
| 350. | Pantothenate | C9H17NO5 | -Infinity | -2.36 | 1.67 | 1.68 |
| 351. | Palmitic acid (C16:0) | C16H32O2 | -Infinity | 0.07 | -0.02 | -0.18 |
| 352. | Stearic acid (C18:0) | C18H36O2 | -Infinity | 0.68 | 0.34 | -0.1 |
| 353. | Oleic acid (C18:1) | C18H34O2 | -Infinity | -1.77 | -0.94 | 0.08 |
| 354. | Linoleic acid (C18:2) | C18H32O2 | -Infinity | -0.17 | -0.66 | -0.15 |
| 355. | Arachidonic acid | C20H32O2 | -Infinity | -0.05 | 0.75 | -1.35 |
| 356. | Myristic acid | C14H28O2 | -Infinity | -1.66 | -1.39 | -1.22 |
| 357. | Lauric acid | C12H24O2 | -Infinity | 4.39 | 0.99 | 2.64 |
| 358. | Capric acid | C10H20O2 | -Infinity | -0.23 | -0.26 | -0.06 |
| 359. | Butyric acid | C4H8O2 | -Infinity | -1.38 | 0.08 | 0.7 |
| 360. | Propionic acid | C3H6O2 | -Infinity | 1 | 0.36 | 1.5 |
| 361. | L-Valine | C5H11NO2 | -Infinity | 2.83 | -2.91 | -1.94 |
| 362. | L-Homocysteine | C6H13NO2 | -Infinity | -3.43 | -3.01 | -2.46 |
| 363. | L-Isoleucine | C6H13NO2 | -Infinity | -1.31 | -0.77 | -0.4 |
| 364. | L-Threonine | C4H9NO3 | -Infinity | -3.71 | -3.45 | -2.43 |
| 365. | L-Methionine | C5H11NO2S | -Infinity | -1.98 | -3.24 | -2.12 |
| 366. | L-Phenylalanine | C9H11NO2 | -Infinity | -3.16 | -3.36 | -2.83 |
| 367. | L-Tyrosine | C9H11NO3 | -Infinity | -4.27 | 1.19 | 1.07 |
| 368. | L-Tryptophan | C11H12N2O2 | -Infinity | -3.13 | -3.01 | -2.65 |
| 369. | L-Serine | C3H7NO3 | -Infinity | -0.27 | -0.11 | 0.11 |
| 370. | L-cysteine | C6H12O6 | -Infinity | -3.73 | -3.68 | -2.62 |
